# Supplementary material
Source: publisher figshare collection journal article supplement (https://frontiersin.figshare.com/ndownloader/files/24492938)

**Supplementary File 6.** Flow diagram of study selection process used in this synthesis following PRISMA-P systematic review practices outlined in Moher et al. 2015.


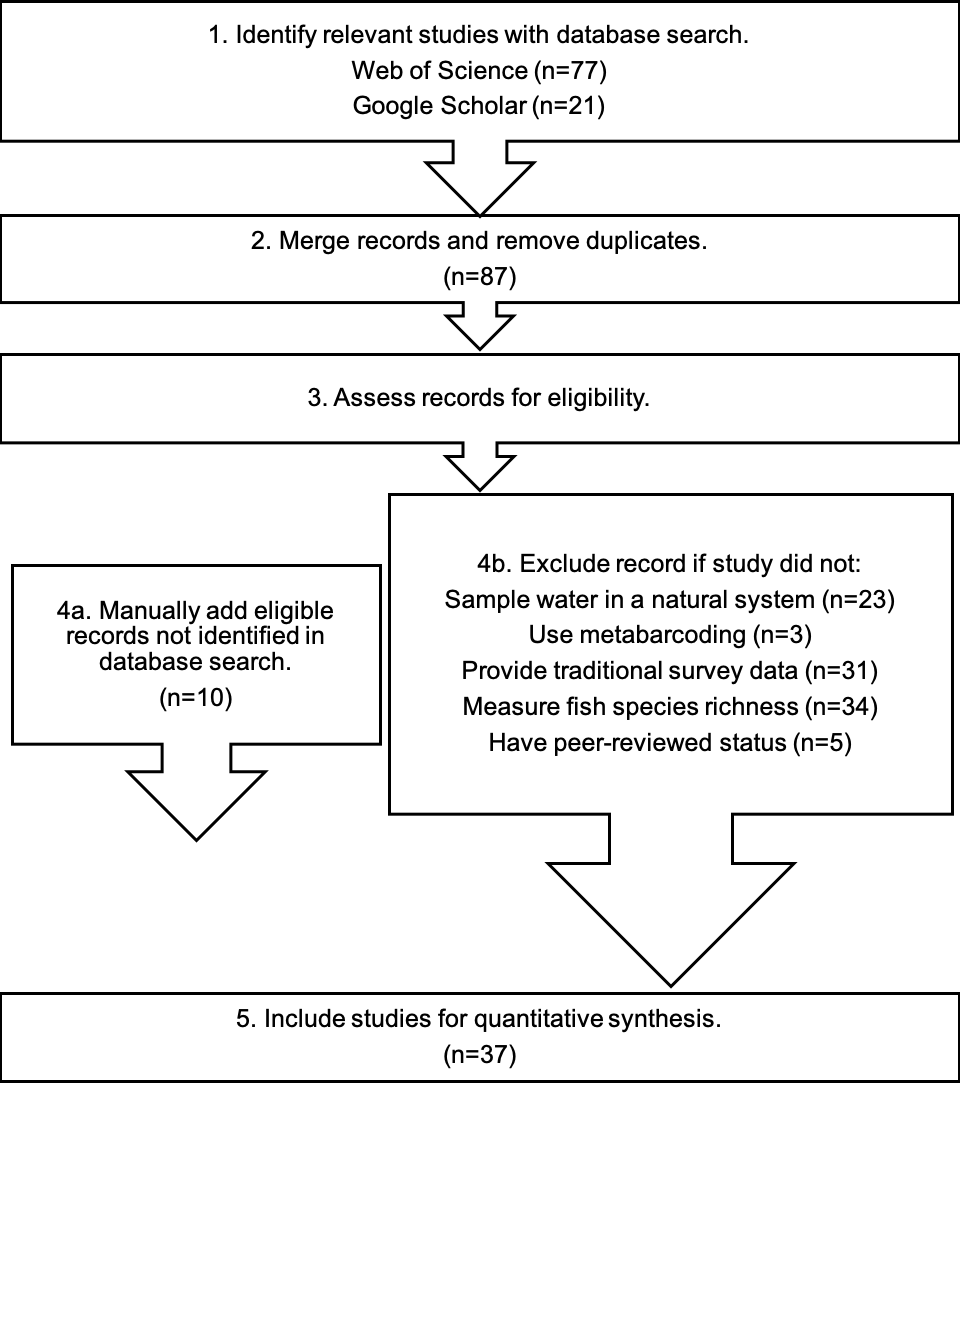

Supplement: Supplementary file 1 [file 24492938]
